# Supplementary material
Source: PubMed Central journal article supplement (PMC6128285)
Supplement: NIHMS761324-supplement-Legacy_Supplemental_File.pdf [file NIHMS761324-supplement-Legacy_Supplemental_File.pdf]

# Acknowledgment Permission Form

Journal | Stroke  
Manuscript No. | STROKE/2015/01141  
First author | Yu-Ching Cheng  
Title of work | Cocaine use and risk

## Acknowledgment Permission:

Authors must provide written permission/approval from all individuals mentioned by name in the Acknowledgements section of a submitted manuscript. By signing this form, any and all acknowledged persons therefore state that they have read and approved the mention of their names in the Acknowledgment section of the aforementioned paper.

Printed Name | Cheryl Sloan  
Signature | *Cheryl R. Sloan*  
Date | *Jan. 27 - 2016*
