# Supplementary material
Source: PubMed Central journal article supplement (PMC6128285)
Supplement: NIHMS761324-supplement-Supplementary.pdf [file NIHMS761324-supplement-Supplementary.pdf]

## **Illicit Cocaine Use and Risk of Ischemic Stroke in Young adults**

### **SUPPLEMENTAL MATERIAL CONTENTS**

Supplemental Table I. Clinical characteristics of 26 IS patients with symptoms occurring within 24 hours of cocaine use. Grouped by probable stroke mechanism.

Illicit Drug Use Questionnaire

Supplemental Table I. Clinical characteristics of 26 IS patients with symptoms occurring within 24 hours of cocaine use. Grouped by probable stroke mechanism.

| <u>Subject</u>                                                     | <u>Age</u> | <u>Sex</u> | <u>Race</u> | <u>Cocaine Administration</u> |                  |                                 | <u>Risk Factor</u>                   | <u>Embolic Source</u>                 |
|--------------------------------------------------------------------|------------|------------|-------------|-------------------------------|------------------|---------------------------------|--------------------------------------|---------------------------------------|
|                                                                    |            |            |             | <u>Route</u>                  | <u>Frequency</u> | <u>Use prior to stroke (hr)</u> |                                      |                                       |
| <b><u>Cardioembolic with confirmed source</u></b>                  |            |            |             |                               |                  |                                 |                                      |                                       |
| A <sup>a</sup>                                                     | 44         | M          | black       | smoke                         | 4x/day           | 14                              | tobacco, HTN, dyslipidemia, diabetes | Afib, Poor ventricular function       |
| B                                                                  | 39         | F          | black       | smoke                         | 1x/day           | 2                               | tobacco, HTN, dyslipidemia           | Poor ventricular function             |
| C <sup>a</sup>                                                     | 37         | F          | black       | smoke                         | 3x/week          | 1                               | HTN, dyslipidemia, diabetes          | Poor ventricular function             |
| D                                                                  | 38         | M          | black       | smoke                         | 3x/day           | 4                               | tobacco, HTN, dyslipidemia, diabetes | Acute MI                              |
| E <sup>a</sup>                                                     | 49         | M          | black       | inhale                        | 1x/week          | <1                              | tobacco                              | Mobile aortic mass                    |
| F <sup>a</sup>                                                     | 35         | F          | black       | inject                        | 1x/day           | <24                             | tobacco                              | Prosthetic mitral valve, Endocarditis |
| G <sup>a</sup>                                                     | 41         | F          | black       | inject                        | 3x/day           | 3                               | tobacco, HTN, AIDS                   | Endocarditis                          |
| <b><u>Cryptogenic strokes in multiple vascular territories</u></b> |            |            |             |                               |                  |                                 |                                      |                                       |
| H                                                                  | 38         | M          | black       | smoke                         | 5x/day           | 6                               | tobacco, HTN                         |                                       |
| I                                                                  | 40         | F          | white       | inject                        | 8x/day           | 1                               | tobacco, HTN                         |                                       |
| J <sup>a</sup>                                                     | 31         | F          | black       | smoke                         | 12x/day          | 15                              | tobacco                              |                                       |
| <b><u>Cryptogenic stroke(s) in a single vascular territory</u></b> |            |            |             |                               |                  |                                 |                                      |                                       |
| K                                                                  | 37         | F          | white       | inhale                        | 6x/year          | 20                              | tobacco                              |                                       |
| L <sup>a</sup>                                                     | 37         | F          | black       | inhale                        | >1x/day          | 1                               | tobacco                              |                                       |
| M                                                                  | 41         | F          | black       | smoke                         | 1x/week          | <24                             | tobacco                              |                                       |
| N <sup>a</sup>                                                     | 34         | F          | black       | smoke                         | 1x/day           | 16                              | tobacco                              |                                       |
| O                                                                  | 46         | M          | black       | smoke                         | 2x/day           | 22                              | tobacco                              |                                       |
| P <sup>a</sup>                                                     | 46         | M          | black       | inhale & smoke                | 4x/year          | 1                               | tobacco, diabetes                    |                                       |
| Q                                                                  | 38         | F          | white       | smoke                         | 1x/day           | 4                               | tobacco, HTN                         |                                       |
| R <sup>b</sup>                                                     | 39         | F          | black       | smoke                         | 3x/month         | 6                               | tobacco                              |                                       |
| S                                                                  | 30         | F          | black       | smoke                         | 5x/week          | 7                               | tobacco, HTN, AIDS,                  |                                       |

**Lacunar**

|                |    |   |       |        |         |    |                            |
|----------------|----|---|-------|--------|---------|----|----------------------------|
| T <sup>a</sup> | 36 | M | black | smoke  | 1x/week | 13 | tobacco, HTN, AIDS         |
| U <sup>b</sup> | 42 | M | black | inhale | 2x/year | 23 | tobacco, dyslipidemia      |
| V              | 44 | M | white | inhale | 3x/week | 18 | tobacco, HTN, dyslipidemia |
| W              | 48 | M | black | smoke  | 2x/day  | 10 | tobacco, dyslipidemia      |
| X              | 49 | M | black | inhale | 1x/year | 1  | tobacco, HTN               |
| Y              | 36 | F | black | smoke  | 1x/day  | 4  | tobacco, HTN, diabetes     |

**Dissection**

|   |    |   |       |        |         |   |         |
|---|----|---|-------|--------|---------|---|---------|
| Z | 42 | F | white | inhale | 2x/week | 1 | tobacco |
|---|----|---|-------|--------|---------|---|---------|

Abbreviations: HTN: hypertension; Afib: atrial fibrillation

<sup>a</sup> Heroin use within 24 hours

<sup>b</sup> Marijuana use within 24 hour

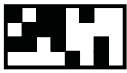

28882

Respondent ID

□ - □□ - □□□□□□ - □ - □

10

107. DRUG USE

EVALUATOR SCRIPT: I would like to ask you some questions about your use of drugs for other purposes. For your protection, we have obtained a confidentiality certificate from the federal government which completely protects this information from being released to anyone.

107A. Have you ever used drugs, pills, or medicines for non-medical or recreational reasons or to "get high"? Your answer is completely confidential. SHOW CARD A AND ASK NUMBER

- Yes No (Go to Q109) Refused (Go to Q109) Don't know (Go to Q109)

108. DRUG UTILIZATION

EVALUATOR SCRIPT: I would like you to look at this table (see card B) and try to remember if you used any of these drugs, the route by which it was taken and when you last used it. I will point to the drug on the card. Tell me if you used the drug and if so by what route(s) and the interval last used prior to your stroke. Again, your answers are completely confidential.

108A Record your responses in columns provided. Show card B and ask number. Use code numbers from Card B

Table with 6 columns: Drug Code#, Name of Drug Used, Route Code #, Route, Duration Code#, How Many. Contains 12 rows of empty boxes for data entry.

DRUG

- 01 = Cocaine "Coke, powder, blow"
02 = Crack "Rock, crack"
03 = Heroin
04 = Marijuana "Weed, pot, grass, bud, herb"
05 = PCP
06 = Speed
07 = Hashish "Hash, cubes"
08 = Ecstasy "E", "X"
09 = Ice "Crystal meth"
10 = LSD "Acid"
11 = Can't recall name
12 = Other, specify:

CARD B FOR EVALUATOR

ROUTE

- 01 = Eat
02 = Inhale
03 = Smoke
04 = Inject through skin
05 = Can't recall

DURATION

- 01 = Years prior to stroke date
02 = Months prior to stroke date
03 = 1 to 30 days prior to stroke date
04 = Within 24 hours prior to stroke date
96 = Not applicable
97 = Refused
98 = Don't know

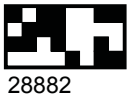

108B During the year prior to your stroke, how often do you/did you usually use \_\_\_\_\_?  
Not Applicable = 96 Refused = 97 Don't know = 98

**ASK FOR EACH DRUG IDENTIFIED AS USED IN Q108A REGARDLESS OF ROUTE.**

| DRUG                                       | #/DAY                                     | #/WEEK                                    | #/MONTH                                   | #/YEAR                                    |
|--------------------------------------------|-------------------------------------------|-------------------------------------------|-------------------------------------------|-------------------------------------------|
| 1 Cocaine<br>coke, powder, blow            | <input type="text"/> <input type="text"/> |
| 2 Crack<br>rock, crack                     | <input type="text"/> <input type="text"/> |
| 3 Heroin                                   | <input type="text"/> <input type="text"/> |
| 4 Marijuana<br>weed, pot, grass, bud, herb | <input type="text"/> <input type="text"/> |
| 5 PCP                                      | <input type="text"/> <input type="text"/> |
| 6 Speed                                    | <input type="text"/> <input type="text"/> |
| 7 Hashish<br>hash, cubes                   | <input type="text"/> <input type="text"/> |
| 8 Ecstasy<br>"E", "X"                      | <input type="text"/> <input type="text"/> |
| 9 Ice<br>crystal meth                      | <input type="text"/> <input type="text"/> |
| 10 LSD<br>acid                             | <input type="text"/> <input type="text"/> |
| 11 Can't recall name                       | <input type="text"/> <input type="text"/> |
| 12 Other, specify<br><input type="text"/>  | <input type="text"/> <input type="text"/> | <input type="text"/> <input type="text"/> | <input type="text"/> <input type="text"/> | <input type="text"/> <input type="text"/> |
